# Supplementary material
Source: publisher site journal article supplement (https://www.dovepress.com/article/536395)
Supplement: Supplementary file 1 [file 536395%20Revised%20Supplementary%20Figure%201.docx]

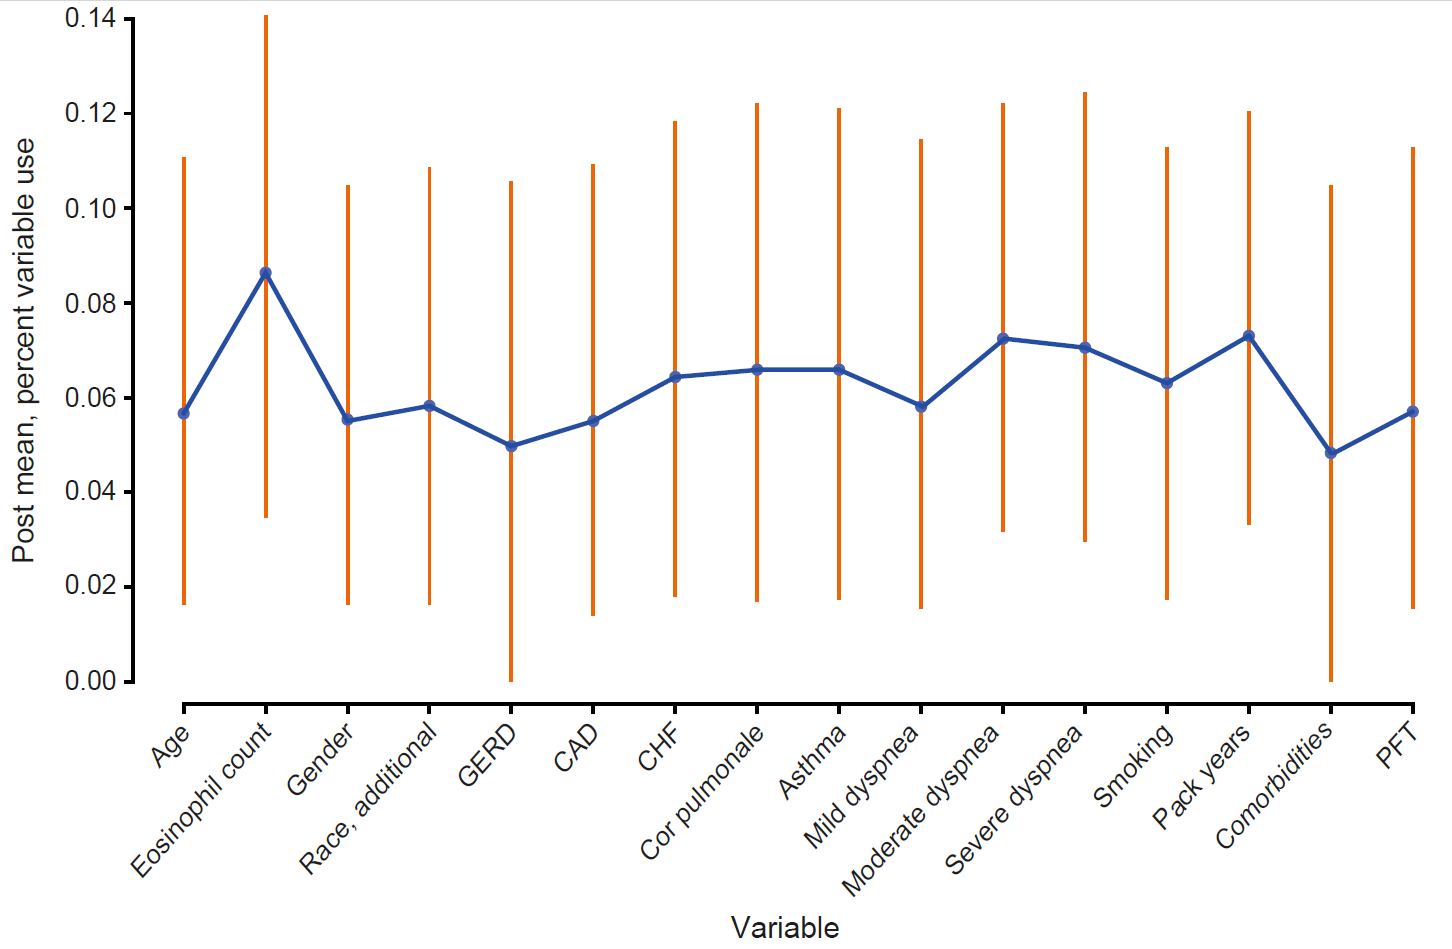


**Supplementary Figure 1** Frequency of variable selection in a BART prediction model.

The frequency by which the BART algorithm is split on each variable is shown in the classification trees as a percentage.

BART, Bayesian Additive Regression Trees; CAD, coronary artery disease; CHF, congestive heart failure; GERD, gastroesophageal reflux disease; PFT, pulmonary function test.
